# Supplementary material for: Conformational characterization of a novel anti-HER2 candidate antibody
Source: PubMed Central journal article supplement (PMC6508720; doi:10.1371/journal.pone.0215442), 2019-05-09
Supplement: pone.0215442.s001.pdf [file pone.0215442.s001.pdf]

**A:** Proteolytic degradation by trypsin, chymotrypsin, Lys-C and Asp-N enzymes of the heavy chain of Herceptin®. 97.1% coverage

EVQLVESGGGLVQPGGSLRLSCAASGFN**IKD**TYIHWRQAPGKGLEWVARI**YPTNGYTRY**ADSVKGRF  
TISADTSKNTAYLQMN**SLRAEDTAVYYCSRWGGDGFYAMDY**WGQGLVTVSSASTKGPSVFPLAPSSK  
STSGGTAALGCLVKDYFPEPVTVSWNSGALTSGVHTFPAVLQSSGLYSLSSVTVPSSSLGTQTYICN  
VNHKPSNTKV**DKKVEPKSCDKTHTCPPCPAPELLGGPSVFLFPPKPKDTLMISRTPEVTCVVDV**SHEDPEV  
KFNWYVDGVEVHNAKTKPREEQYNSTYRVVSVLTVLHQDWLNGKEYKCKVSNKALPAPIEK**TISKAKGQ**  
PREPQVYTLPPSR**DEL**TKNQVSLTCLVKGFYPSDIAVEWESNGQPENNYK**TTTPVLDSDGSFF**LYSKLT  
VDKSRWQQGNV**FSCSV**MHEALHNHYTQKSLSLSPGK

**B:** Proteolytic degradation by trypsin, chymotrypsin, Lys-C and Asp-N enzymes of the heavy chain of 5G4 mAb. 96.0% coverage

EVQLVESGGGLVQPGGSLRLSCAASGFN**IKD**TYIHWRQAPGKGLEWVARI**YPTNGYTRY**ADSVKGRF**T**  
ISADTSKNTAYLQMN**SLRAEDTAVYYCSRWGGDGFYAMDY**WGQGLVTVSSASTKGPSVFPLAPSSK**ST**  
SGGTAALGCLVKDYFPEPVTVSWNSGALTSGVHTFPAVLQSSGLYSLSSVTVPSSSLGTQTYICNVNH  
KPSNTKV**DKKVEPKSCDKTHTCPPCPAPELLGGPSVFLFPPKPKDTLMISRTPEVTCVVDV**SHEDPEV  
KFNWYVDGVEVHNAKTKPREEQYNSTYRVVSVLTVLHQDWLNGKEYKCKVSNKALPAPIEK**TISKAKGQ**  
PREPQVYTLPPSR**DEL**TKNQVSLTCLVKGFYPSDIAVEWESNGQPENNYK**TTTPVLDSDGSFF**LYSKLT  
VDKSRWQQGNV**FSCSV**MHEALHNHYTQKSLSLSPGK

**S1 Fig: Sequence by MALDI and ESI of Herceptin and 5G4 mAb.** The proteolytic degradation of the heavy chain for both antibodies is observed. In red: mapped sequence, in black: sequence without mapping and highlighted in red: the CDRs. A and B: Proteolytic degradation by trypsin, chymotrypsin, Lys-C and Asp-N enzymes of the heavy chain of Herceptin and 5G4 mAb, respectively.
