# Supplementary material for: Conformational characterization of a novel anti-HER2 candidate antibody
Source: PubMed Central journal article supplement (PMC6508720; doi:10.1371/journal.pone.0215442), 2019-05-09
Supplement: pone.0215442.s002.pdf [file pone.0215442.s002.pdf]

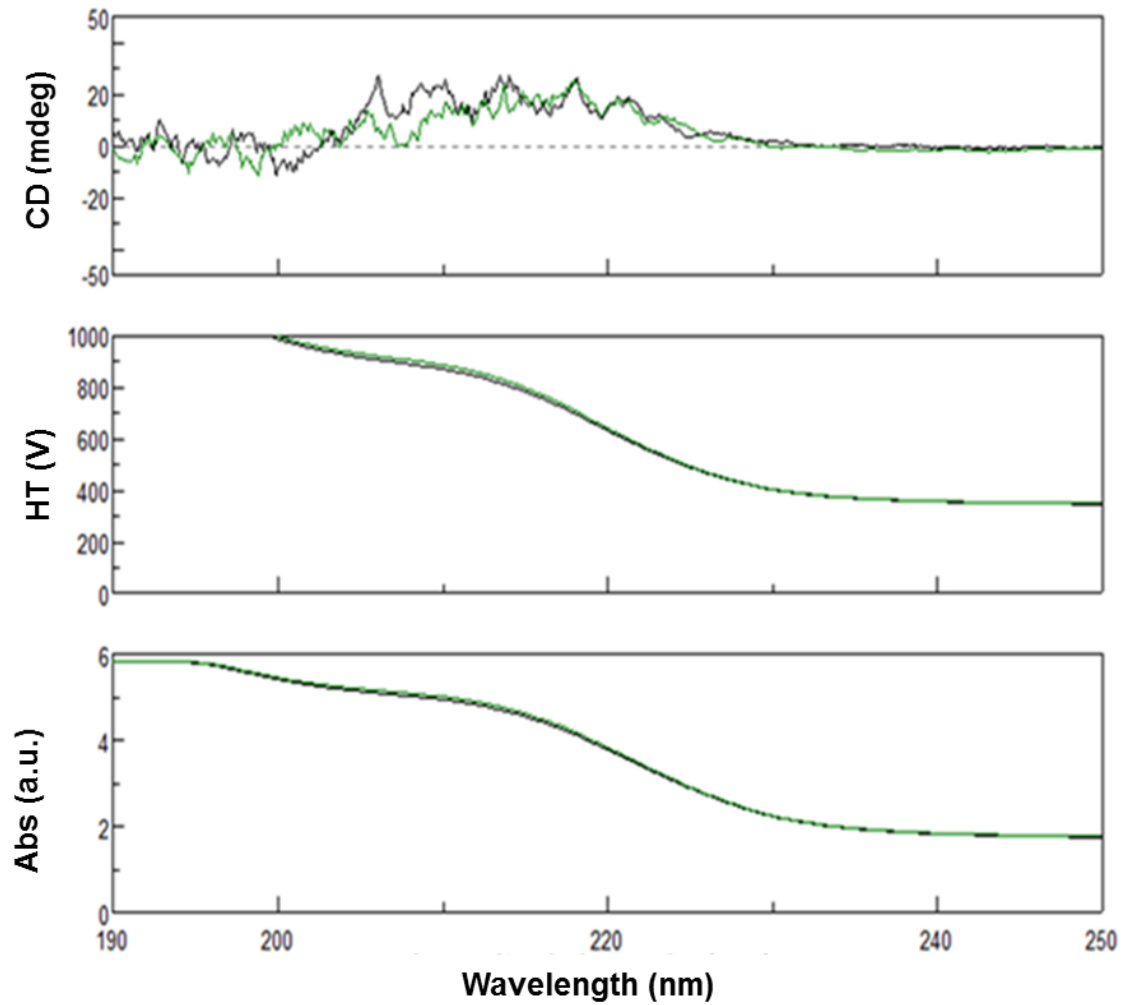

**S2 Fig: Far UV-CD spectra of 5G4 mAb and Herceptin in the formulation solution.** One batch of each mAb is shown: Herceptin (green) and 5G4 mAb (black). The readings of circular dichroism (CD), high tension (HT) and absorbance (Abs) for each wavelength are observed.
