# Supplementary material for: Conformational characterization of a novel anti-HER2 candidate antibody
Source: PubMed Central journal article supplement (PMC6508720; doi:10.1371/journal.pone.0215442), 2019-05-09
Supplement: pone.0215442.s003.pdf [file pone.0215442.s003.pdf]

**S1 Table:** Wavelengths of the positive and negative bands by far-UV CD spectra.

| Batches           | $\beta$ -Sheets wavelength characteristics (nm) |                  |
|-------------------|-------------------------------------------------|------------------|
| 5G4 mAb Batch 1   | 201.8                                           | 218.8            |
| 5G4 mAb Batch 2   | 201.8                                           | 216.7            |
| 5G4 mAb Batch 3   | 201.9                                           | 217.8            |
| Mean $\pm$ SD     | 201.8 $\pm$ 0.1                                 | 217.8 $\pm$ 1.0* |
| Herceptin Batch 1 | 202.2                                           | 218.9            |
| Herceptin Batch 2 | 202.5                                           | 217.0            |
| Mean $\pm$ SD     | 202.4 $\pm$ 0.2                                 | 218.0 $\pm$ 1.3  |

**Legend.** SD, Standard deviation.
