# Supplementary material for: Conformational characterization of a novel anti-HER2 candidate antibody
Source: PubMed Central journal article supplement (PMC6508720; doi:10.1371/journal.pone.0215442), 2019-05-09
Supplement: pone.0215442.s004.pdf [file pone.0215442.s004.pdf]

**S2 Table:** Position of the absorption bands by near-UV CD spectra of the 5G4 mAb and Herceptin.

| Batches           | Absorption maximum of the Trp (nm) |
|-------------------|------------------------------------|
| 5G4 Batch 1       | 295.9                              |
| 5G4 Batch 2       | 295.1                              |
| 5G4 Batch 3       | 296.9                              |
| Mean $\pm$ SD     | 296.0 $\pm$ 0.9                    |
| Herceptin Batch 1 | 296.2                              |
| Herceptin Batch 2 | 296.2                              |
| Mean $\pm$ SD     | 296.2 $\pm$ 0                      |

**Legend.** SD, Standard deviation; Trp, Tryptophan.
