# Supplementary material for: Conformational characterization of a novel anti-HER2 candidate antibody
Source: PubMed Central journal article supplement (PMC6508720; doi:10.1371/journal.pone.0215442), 2019-05-09
Supplement: pone.0215442.s005.pdf [file pone.0215442.s005.pdf]

**S3 Table:** Maximum of fluorescence emission of the tryptophan for 5G4 mAb and Herceptin.

| Batches           | Emission maximum of the Trp (nm) | Intensity (a.u.) |
|-------------------|----------------------------------|------------------|
| 5G4 mAb Batch 1   | 338.0                            | 2.41             |
| 5G4 mAb Batch 2   | 338.0                            | 2.43             |
| 5G4 mAb Batch 3   | 339.0                            | 2.44             |
| Mean $\pm$ SD     | 338.3 $\pm$ 0.6                  | 2.43 $\pm$ 0.02  |
| Herceptin Batch 1 | 339.0                            | 1.52             |
| Herceptin Batch 2 | 338.0                            | 1.81             |
| Mean $\pm$ SD     | 338.5 $\pm$ 0.7                  | 1.67 $\pm$ 0.2   |

**Legend.** SD, Standard deviation; Trp, Tryptophan.
